# Supplementary material for: Comprehensive quali-quantitative profiling of neutral and sialylated O-glycome by mass spectrometry based on oligosaccharide metabolic engineering and isotopic labeling
Source: Royal Society of Chemistry journal article supplement (doi:10.1039/c9ra01114e), 2019-01-01
Supplement: c9ra01114e1.pdf [file c9ra01114e1.pdf]

*Supplementary Information for*

**Comprehensive quali-quantitative profiling of neutral and  
sialylated *O*-glycome by mass spectrometry based on  
oligosaccharide metabolic engineering and isotopic labeling**

Lijing Nan<sup>a</sup>, Jiao Li<sup>a,b</sup>, Wanjun Jin<sup>a,b</sup>, Ming Wei<sup>a,b</sup>, Mengjun Tang<sup>a,b</sup>, Chengjian Wang<sup>a,b</sup>, Guiping Gong<sup>a,b</sup>, Linjuan Huang<sup>a,b</sup>, Ying Zhang<sup>a\*</sup>, Zhongfu Wang<sup>a,b\*</sup>

*<sup>a</sup>Key Laboratory of Resource Biology and Biotechnology in Western China, Ministry of Education and Provincial Key Laboratory of Biotechnology, College of Life Sciences, Northwest University, Xi'an 710069, China*

*<sup>b</sup>College of Food Sciences and Technology, Northwest University, Xi'an 710069, China*

## Table of Contents

|                                                                                                                                                             |                   |
|-------------------------------------------------------------------------------------------------------------------------------------------------------------|-------------------|
| <b><sup>1</sup>H NMR spectra of Ac<sub>3</sub>GalNAc-<math>\alpha</math>-Bn<sup>d0</sup></b>                                                                | <b>Fig. S1A</b>   |
| <b><sup>13</sup>C NMR spectra of Ac<sub>3</sub>GalNAc-<math>\alpha</math>-Bn<sup>d0</sup></b>                                                               | <b>Fig. S1B</b>   |
| <b><sup>1</sup>H NMR spectra of Ac<sub>3</sub>GalNAc-<math>\alpha</math>-Bn<sup>d5</sup></b>                                                                | <b>Fig. S1C</b>   |
| <b><sup>13</sup>C NMR spectra of Ac<sub>3</sub>GalNAc-<math>\alpha</math>-Bn<sup>d5</sup></b>                                                               | <b>Fig. S1D</b>   |
| <b>Reaction scheme for the linkage-specific derivatization of Bn-<i>O</i>-glycans with terminal sialic acids</b>                                            | <b>Fig. S2</b>    |
| <b>ESI-MS/MS fragmentation of Bn-<i>O</i>-glycans from SMMC-7721 cells</b>                                                                                  | <b>Fig. S3A-I</b> |
| <b>ESI-MS/MS fragmentation of Bn-<i>O</i>-glycans from L02 cells</b>                                                                                        | <b>Fig. S4A-B</b> |
| <b>ESI-MS profiles of specificity derivatize <i>a</i> 2,3/ <i>a</i> 2,6-Neu5Ac-Lac</b>                                                                      | <b>Fig. S5</b>    |
| <b>Comprehensive quali-quantitative profiling of Bn-<i>O</i>-glycome in L02 and SMMC-7721 cells by MS</b>                                                   | <b>Table S 1</b>  |
| <b>Comprehensive quali-quantitative discrimination linkage specificity of Bn-<i>O</i>-glycans with/without sialic acids ends in L02 and SMMC-7721 cells</b> | <b>Table S 2</b>  |

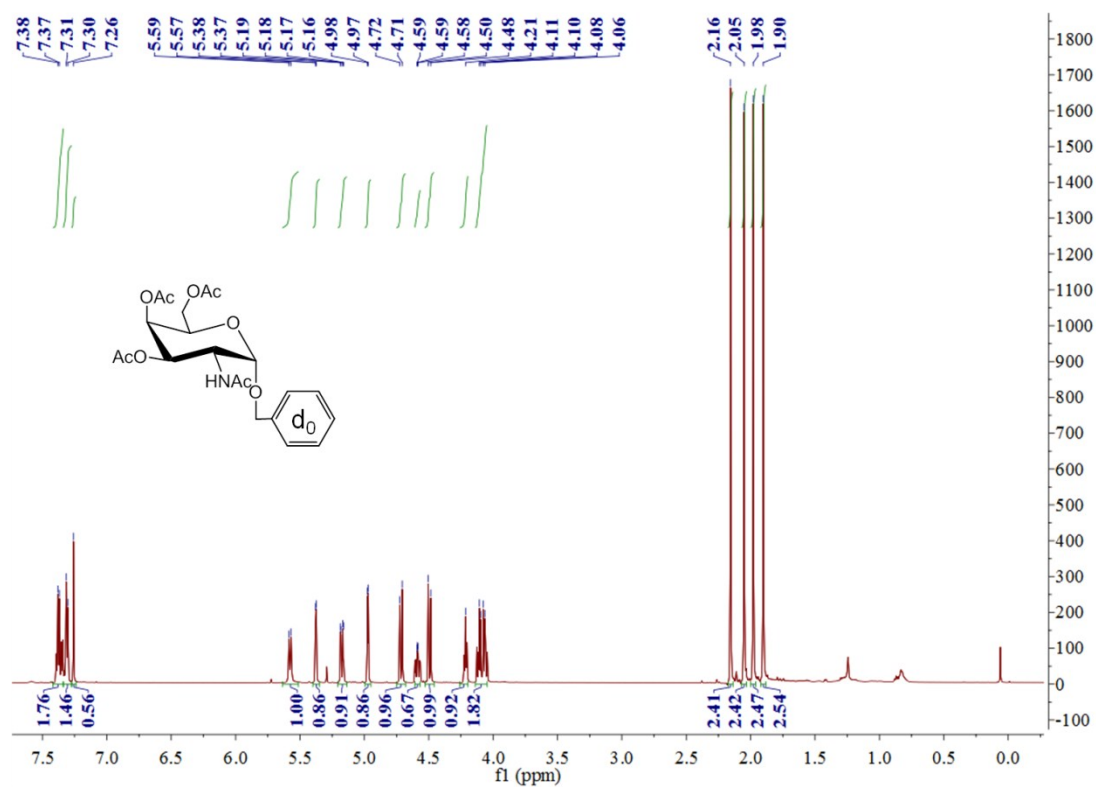

Fig.S 1A  $^1\text{H}$  NMR spectra of  $\text{Ac}_3\text{GalNAc-}\alpha\text{-Bn}^{\text{d}0}$

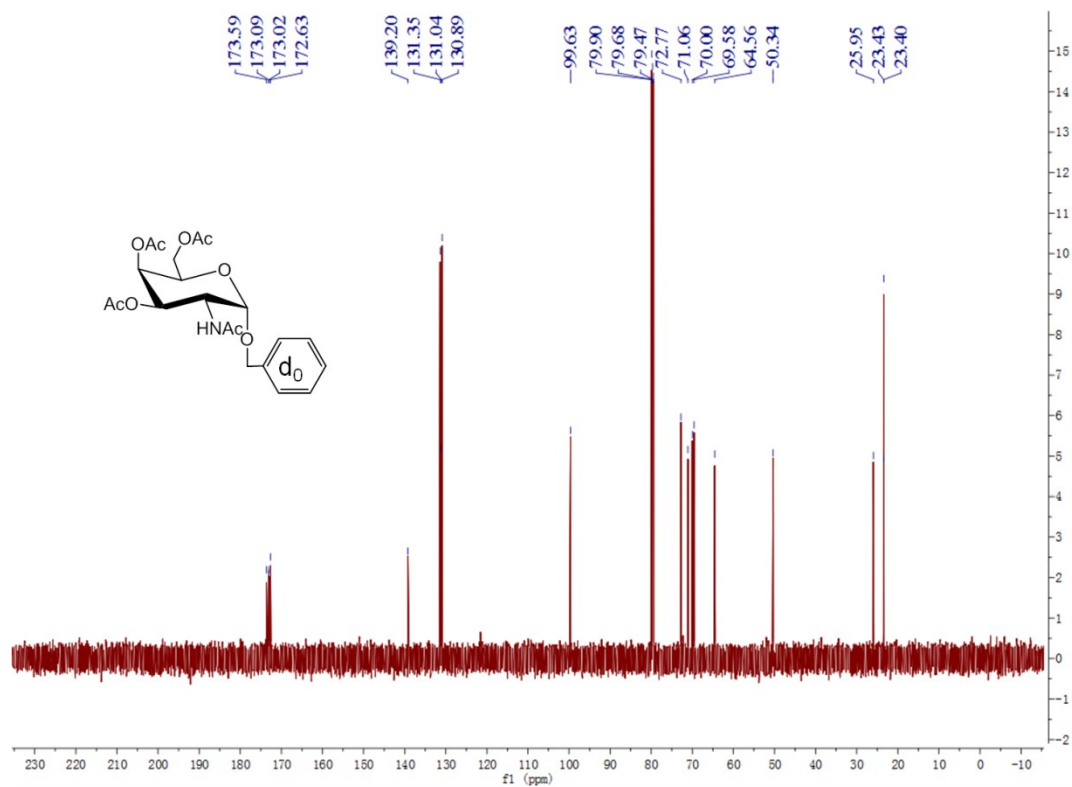

Fig.S 1B  $^{13}\text{C}$  NMR spectra of  $\text{Ac}_3\text{GalNAc-}\alpha\text{-Bn}^{\text{d}0}$

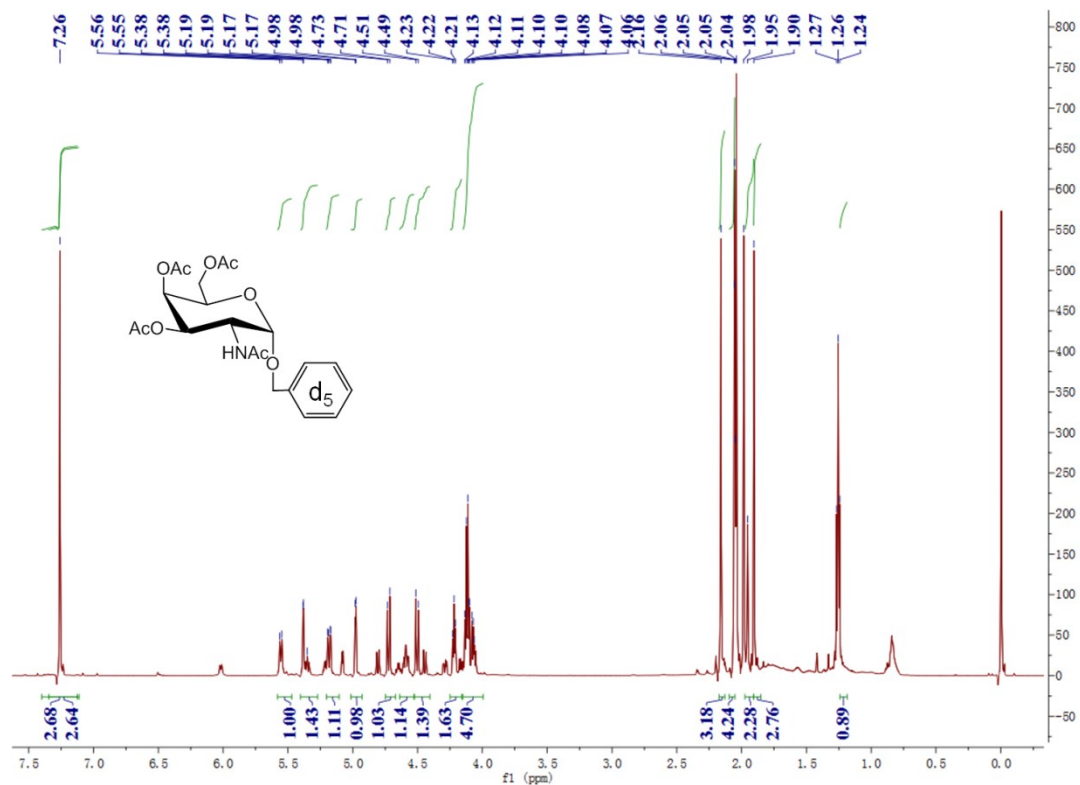

Fig.S 1C  $^1\text{H}$  NMR spectra of  $\text{Ac}_3\text{GalNAc-}\alpha\text{-Bn}^{\text{d}_5}$

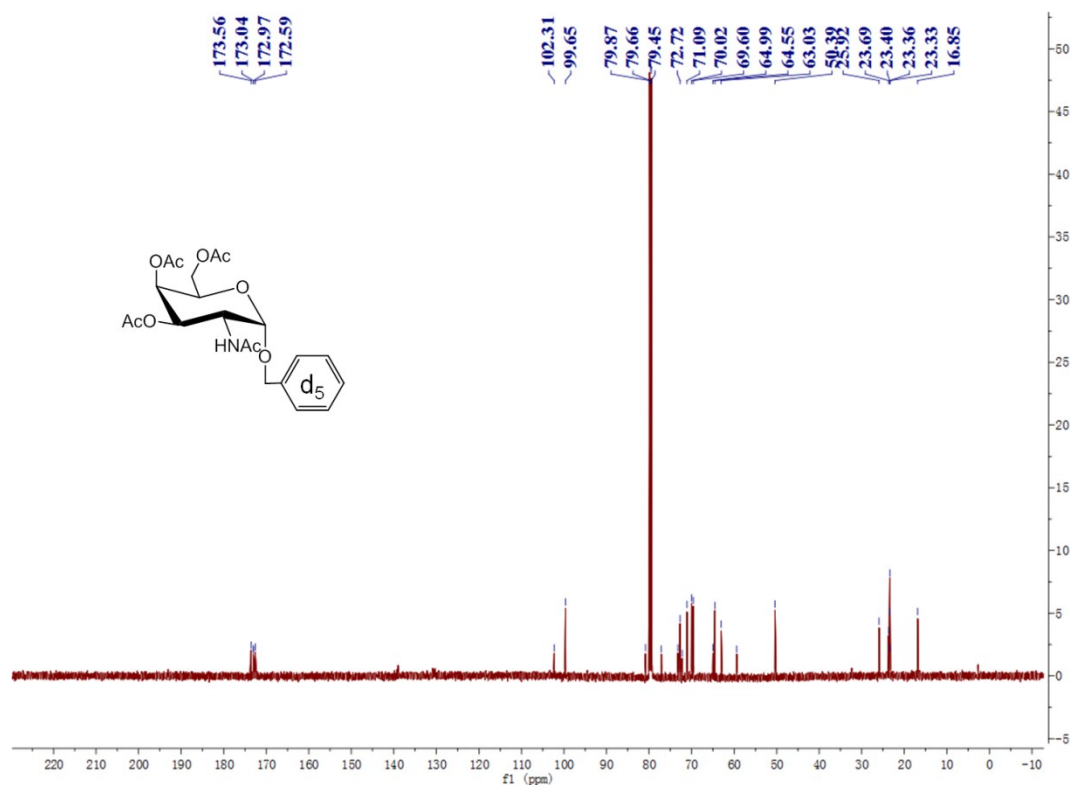

Fig.S 1D  $^{13}\text{C}$  NMR spectra of  $\text{Ac}_3\text{GalNAc-}\alpha\text{-Bn}^{\text{d}_5}$

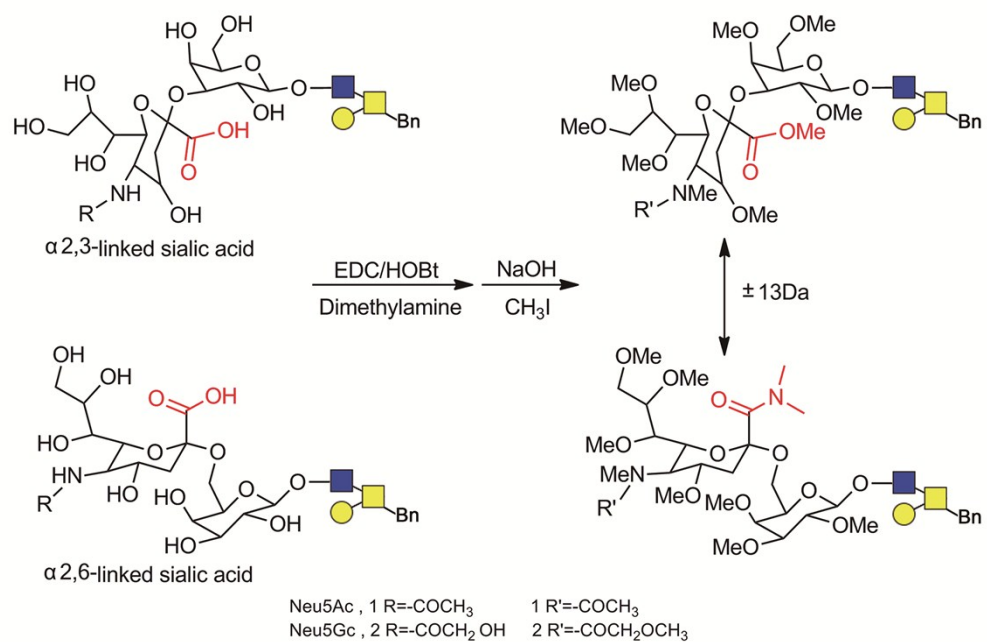

**Fig.S 2** Reaction scheme for sialic acid specific derivatization of Bn-*O*-glycans with terminal sialic acids

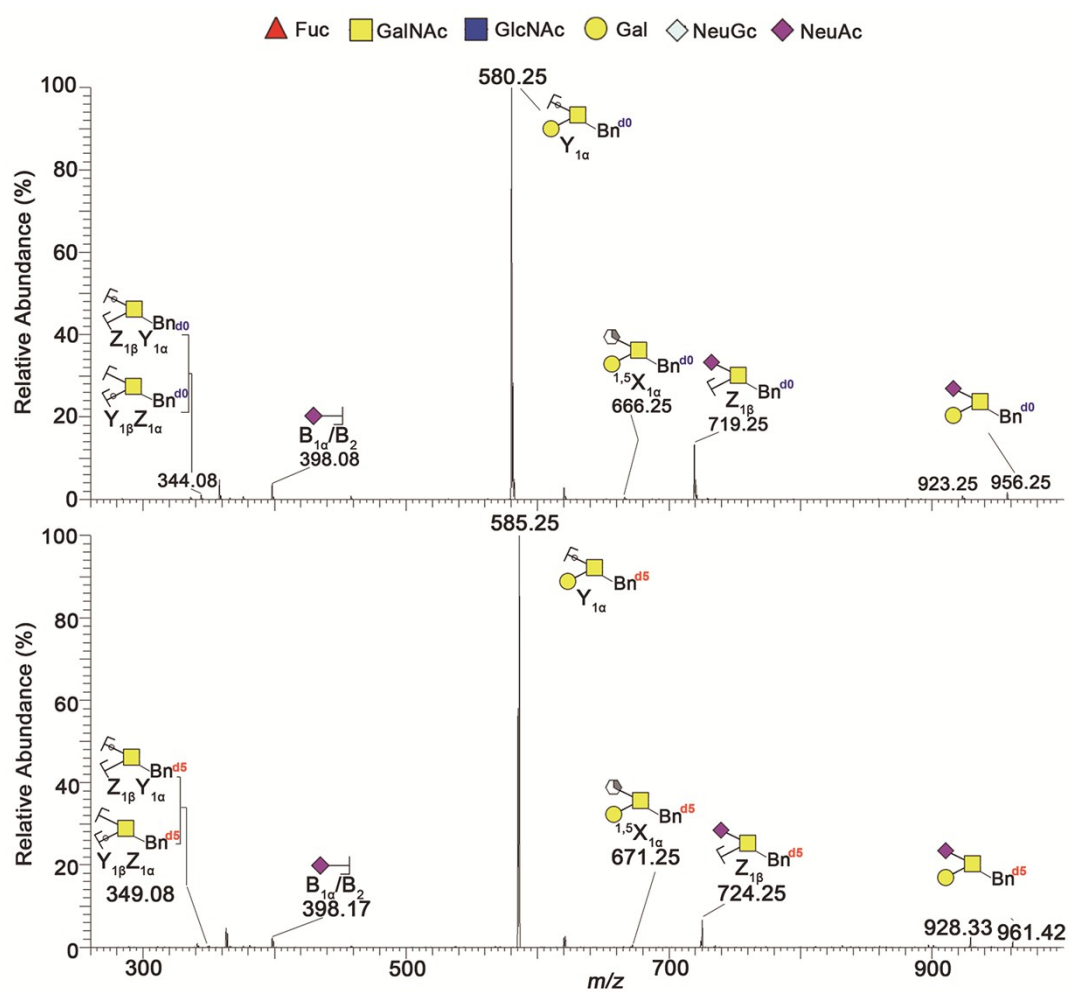

**Fig.S 3A** Comparative sequencing of d0- and d5-Bn-labeled *O*-glycans from SMMC-7721 by ESI-MS/MS. Peaks at  $m/z$  955.25/960.33 was fragmented by CID, respectively.

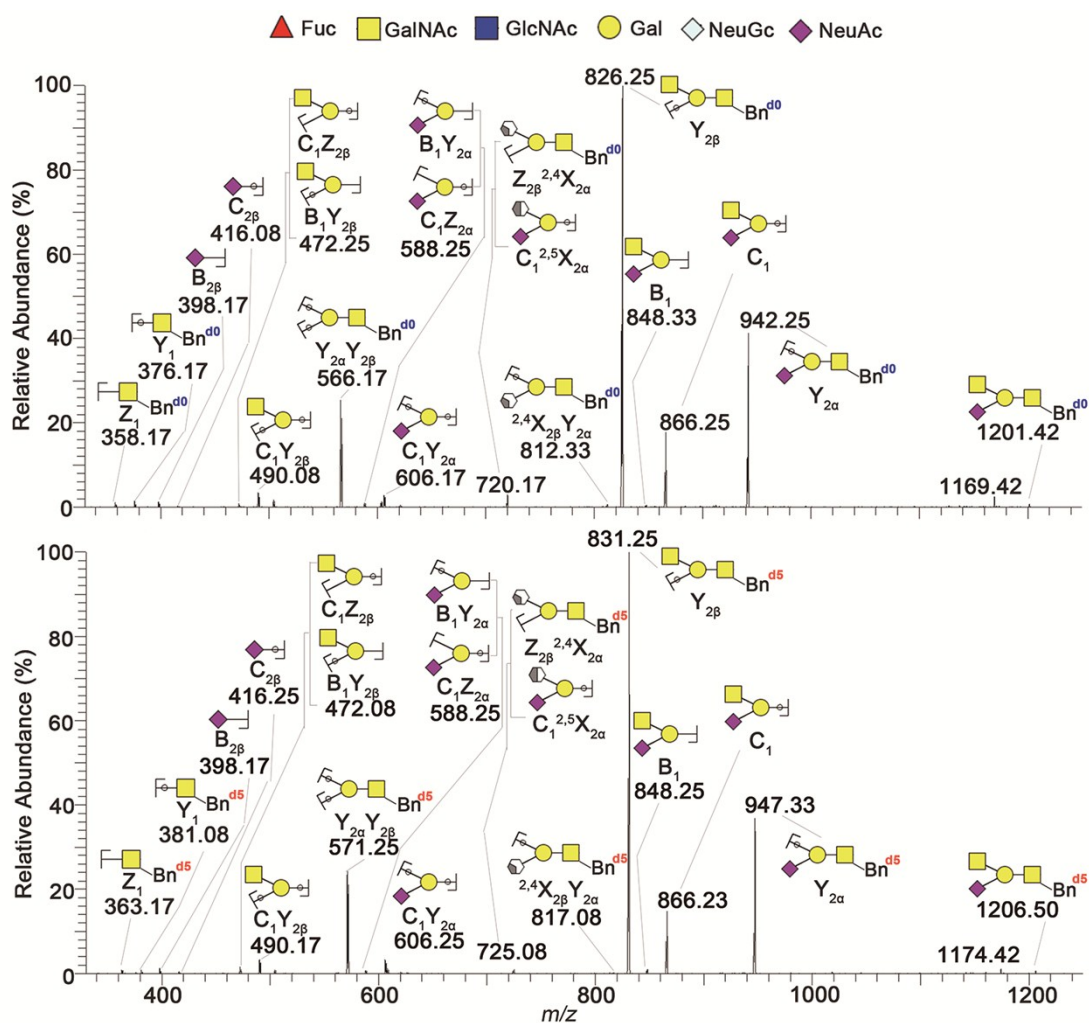

**Fig.S 3B** Comparative sequencing of d<sup>0</sup>- and d<sup>5</sup>-Bn-labeled *O*-glycans from SMMC-7721 by ESI-MS/MS. Peaks at  $m/z$  1200.33/1205.33 was fragmented by CID, respectively.

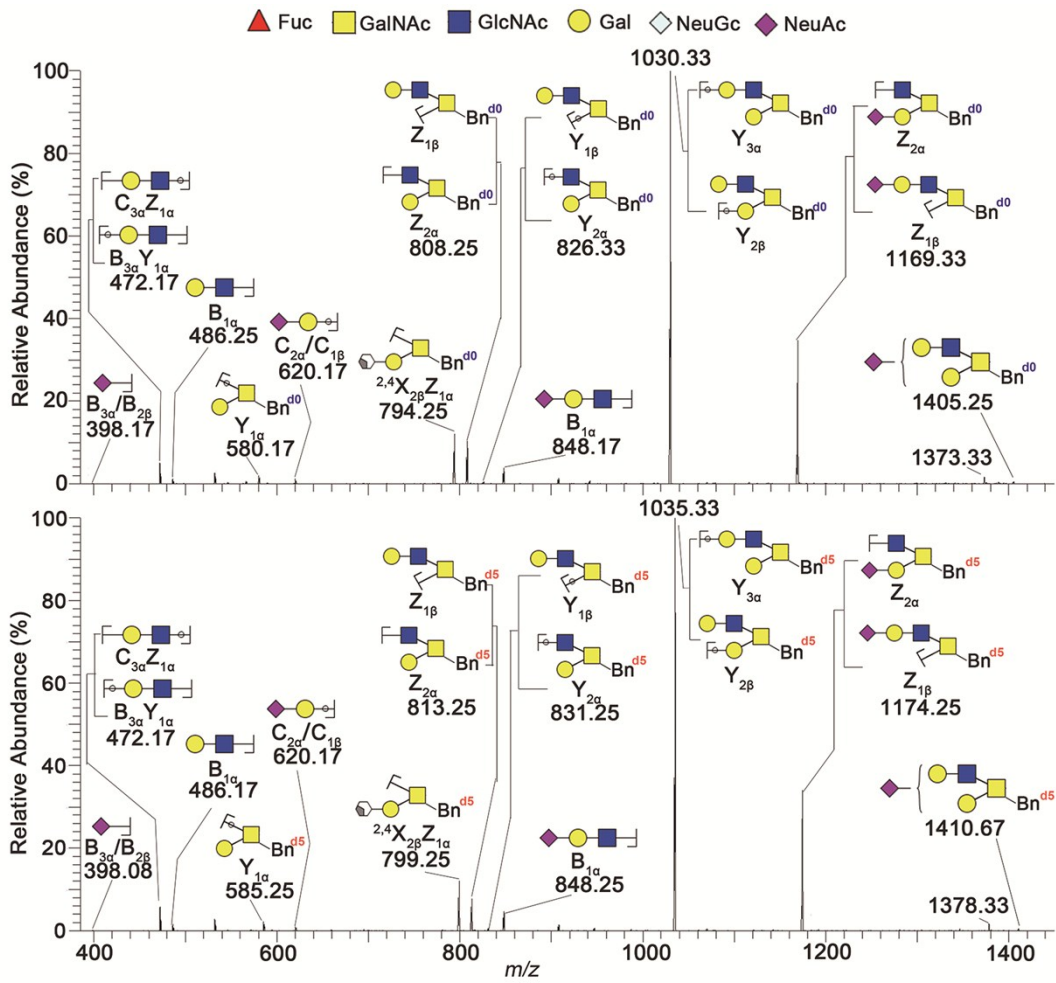

**Fig.S 3C** Comparative sequencing of d0- and d5-Bn-labeled *O*-glycans from SMMC-7721 by ESI-MS/MS. Peaks at  $m/z$  1404.42/1409.42 was fragmented by CID, respectively.



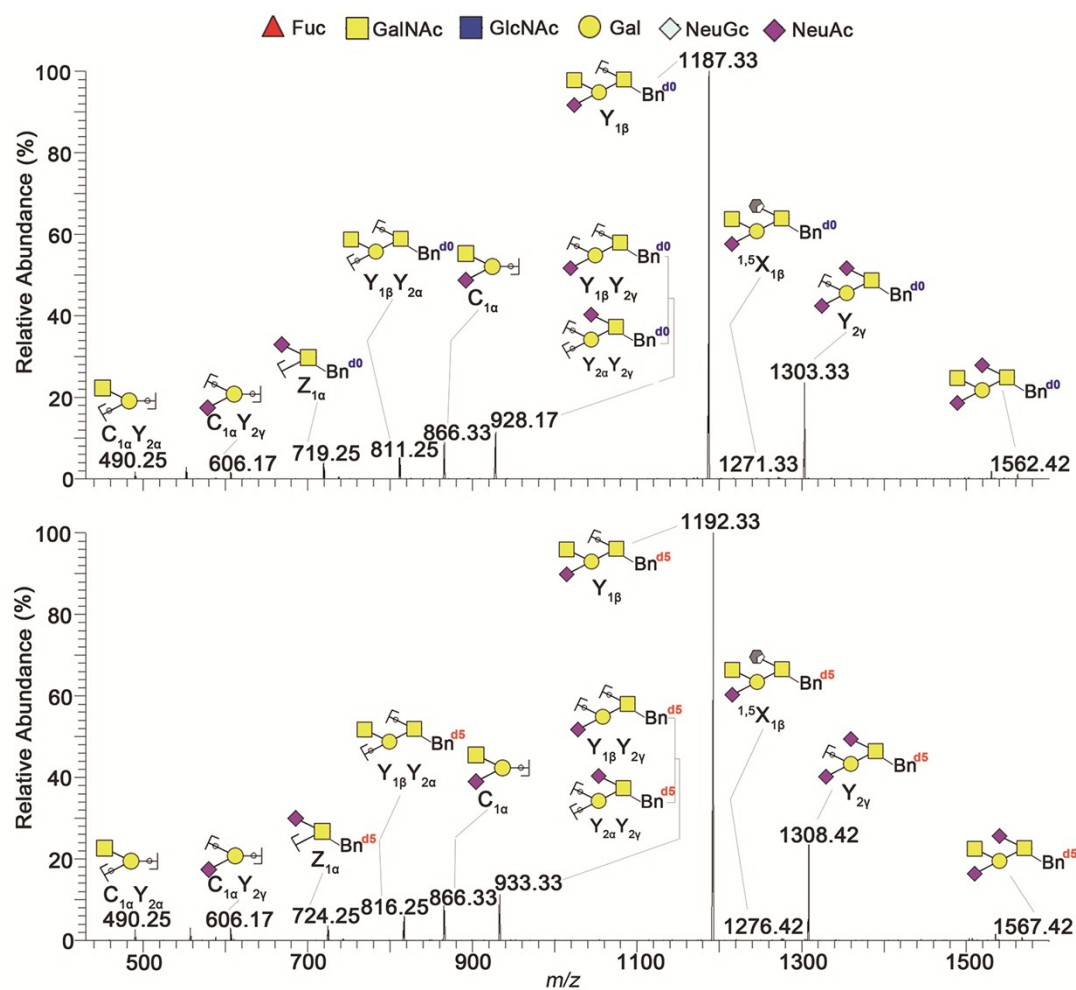

**Fig.S 3D** Comparative sequencing of d0- and d5-Bn-labeled *O*-glycans from SMMC-7721 by ESI-MS/MS. Peaks at  $m/z$  1561.33/1566.42 was fragmented by CID, respectively.

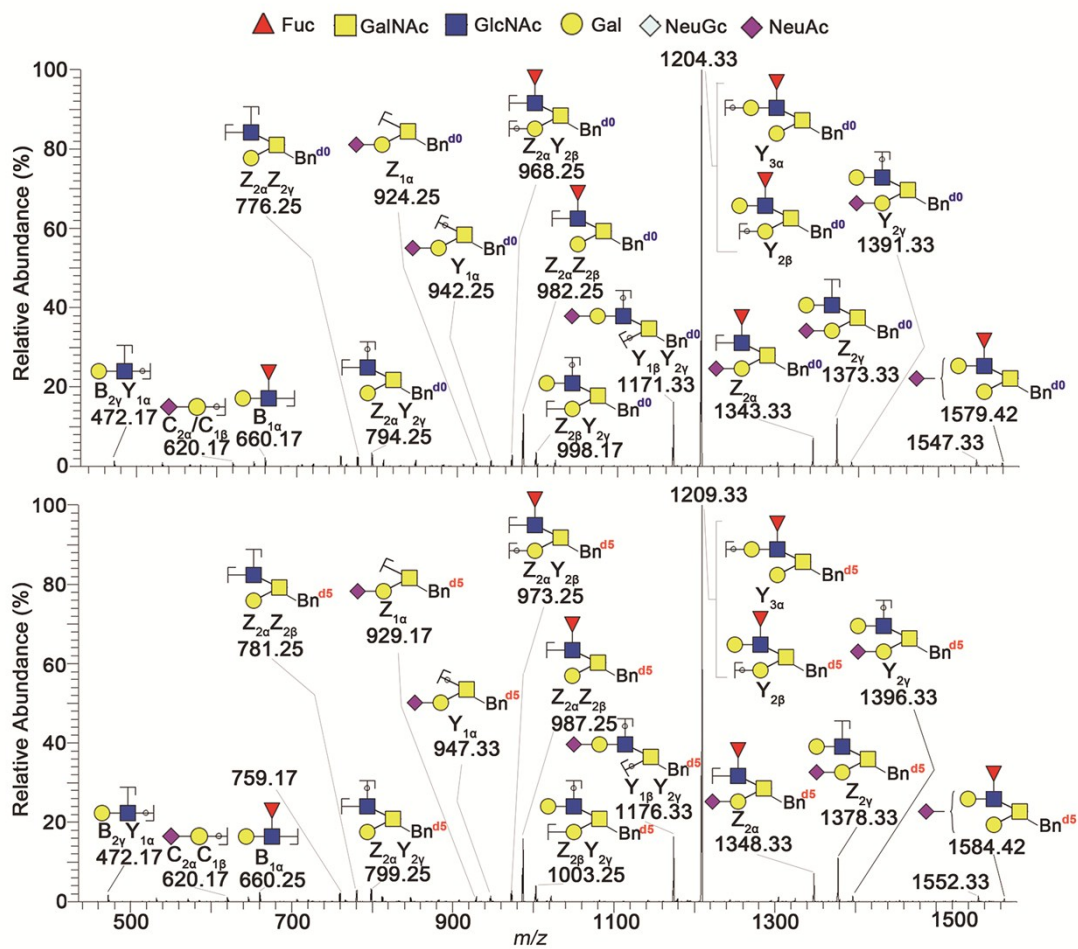

**Fig.S 3E** Sequencing of d<sup>0</sup>- and d<sup>5</sup>-Bn-labeled *O*-glycans from SMMC-7721 by ESI-MS/MS. Peaks at  $m/z$  1578.17/1583.25 was fragmented by CID, respectively.

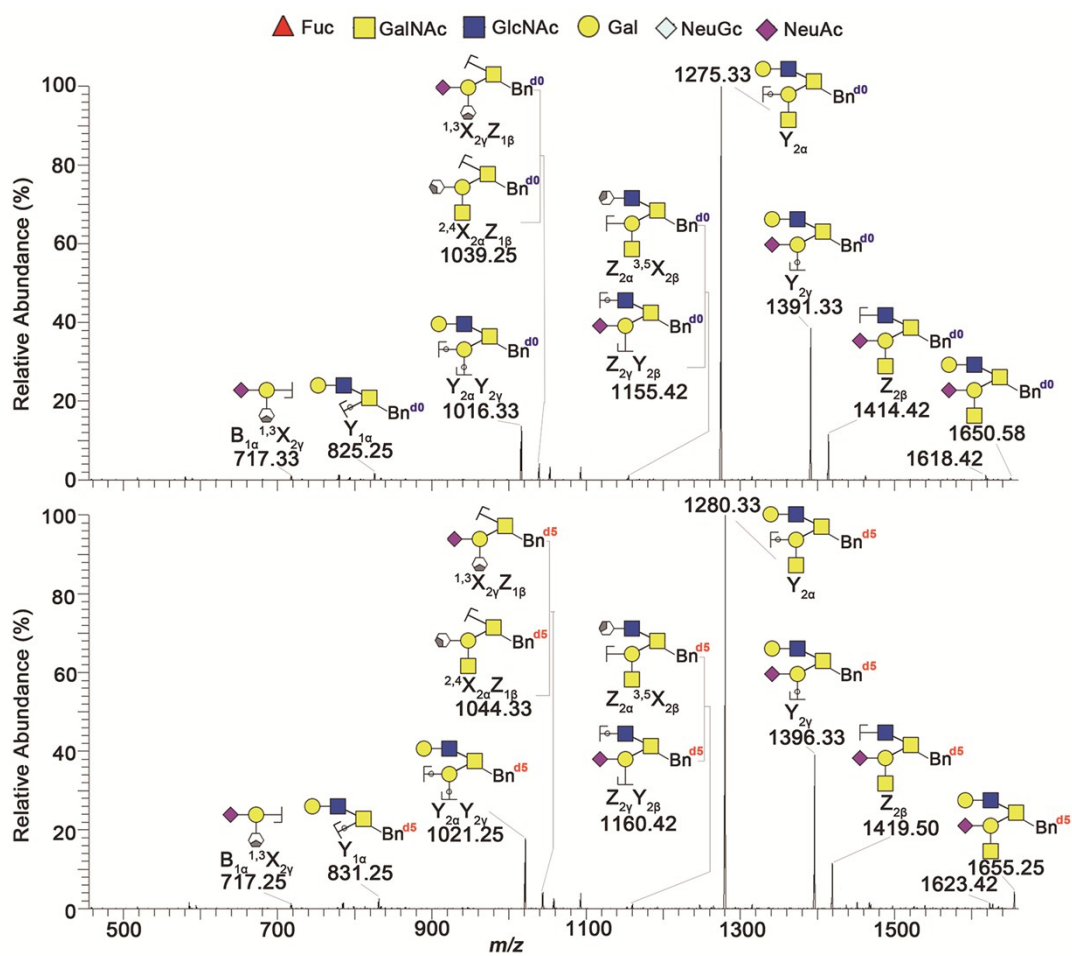

**Fig.S 3F** Sequencing of d<sup>0</sup>- and d<sup>5</sup>-Bn-labeled *O*-glycans from SMMC-7721 by ESI-MS/MS. Peaks at *m/z* 1649.25/1654.42 was fragmented by CID, respectively.

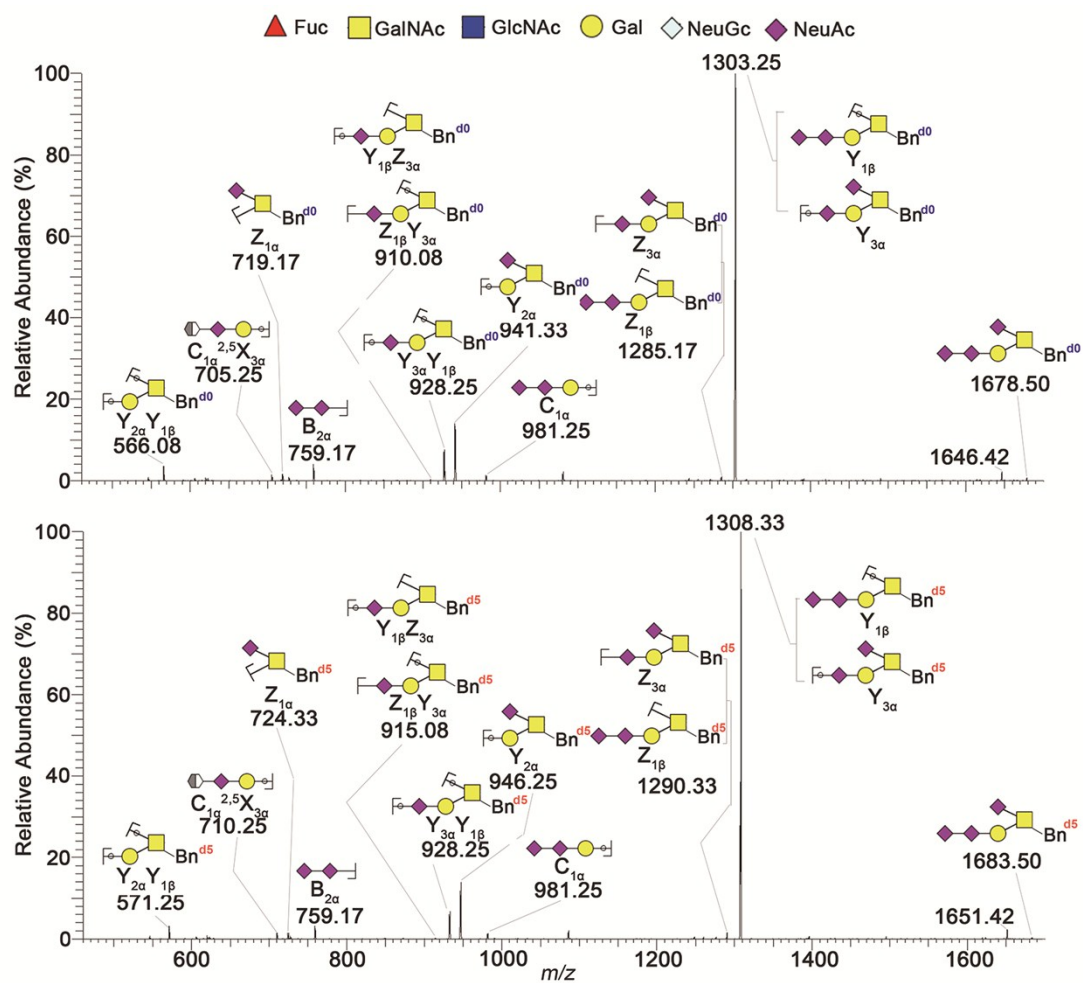

**Fig.S 3G** Sequencing of d<sup>0</sup>- and d<sup>5</sup>-Bn-labeled *O*-glycans from SMMC-7721 by ESI-MS/MS. Peaks at *m/z* 1677.42/1682.33 was fragmented by CID, respectively.

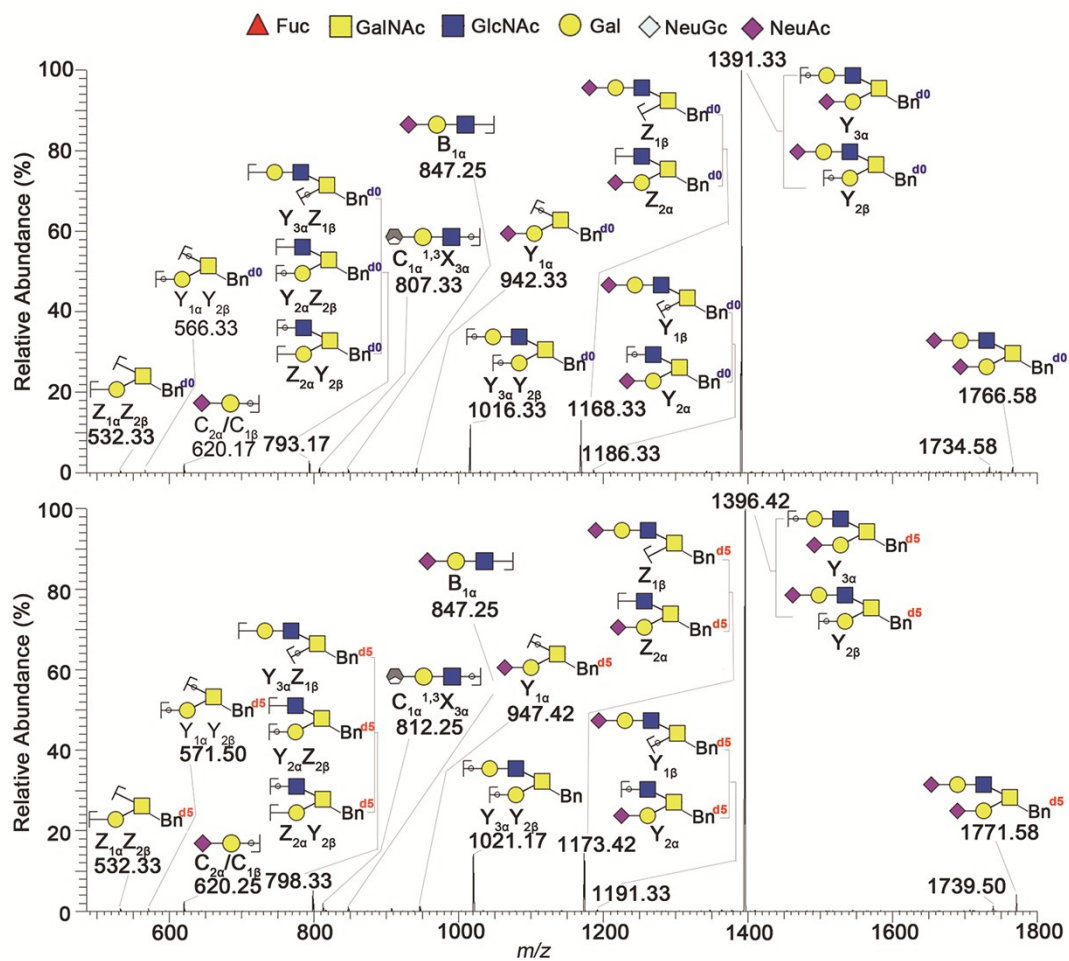

**Fig.S 3H** Sequencing of d<sup>0</sup>- and d<sup>5</sup>-Bn-labeled *O*-glycans from SMMC-7721 by ESI-MS/MS. Peaks at *m/z* 1765.42/1770.50 was fragmented by CID, respectively.

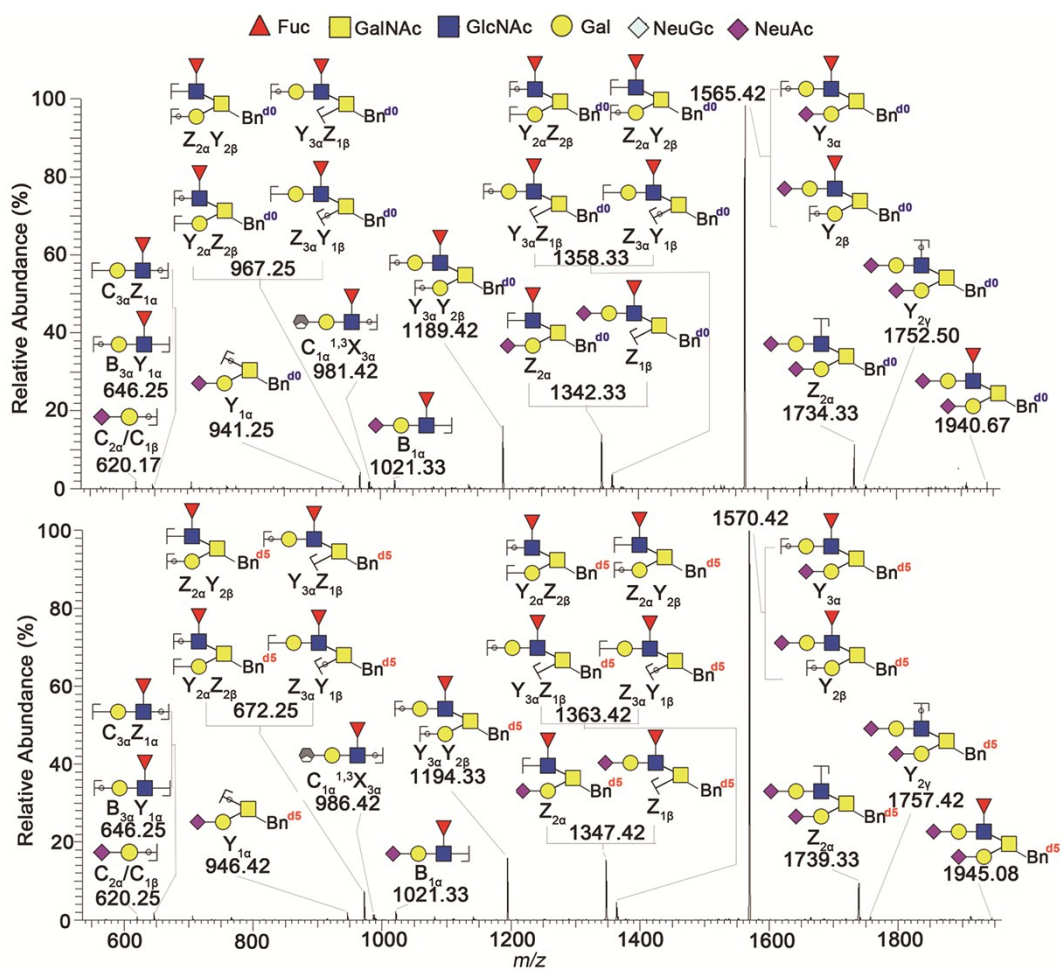

**Fig.S 3I** Sequencing of d<sup>0</sup>- and d<sup>5</sup>-Bn-labeled *O*-glycans from SMMC-7721 by ESI-MS/MS. Peaks at *m/z* 1939.33/1944.50 was fragmented by CID, respectively.

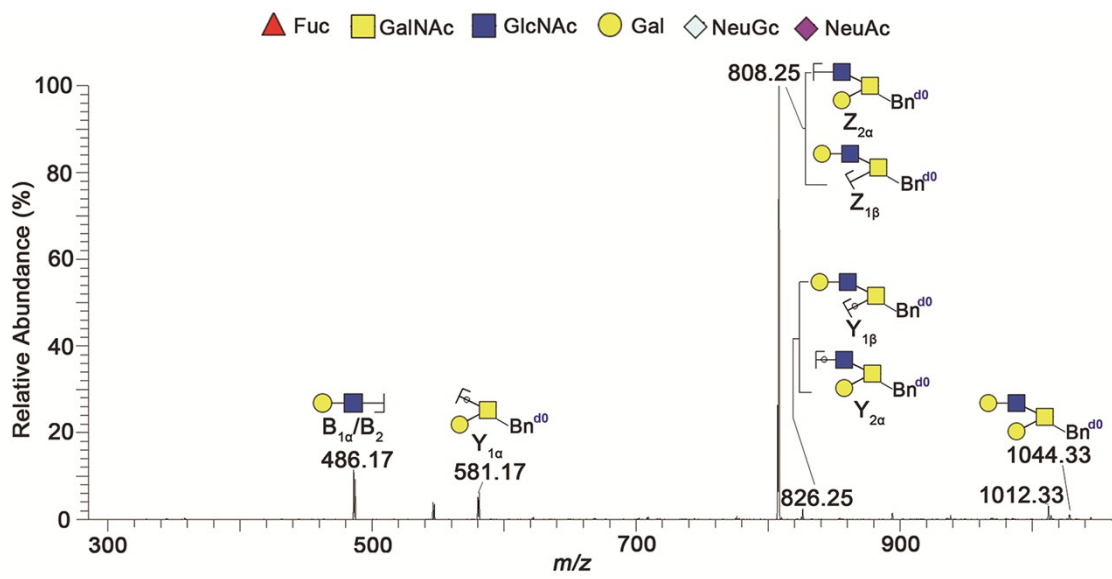

**Fig.S 4A** Sequencing of d<sup>0</sup>-Bn-labeled *O*-glycans from L02 by ESI-MS/MS. Peaks at *m/z* 1043.33 was fragmented by CID.

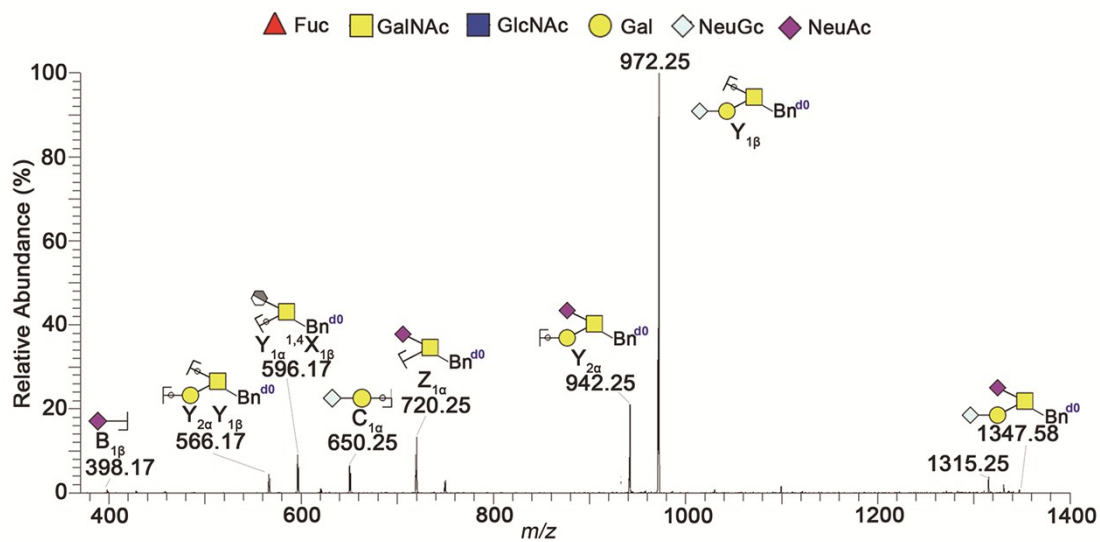

**Fig.S 4B** Sequencing of d0-Bn-labeled *O*-glycans from L02 by ESI-MS/MS. Peaks at *m/z* 1346.33 was fragmented by CID.



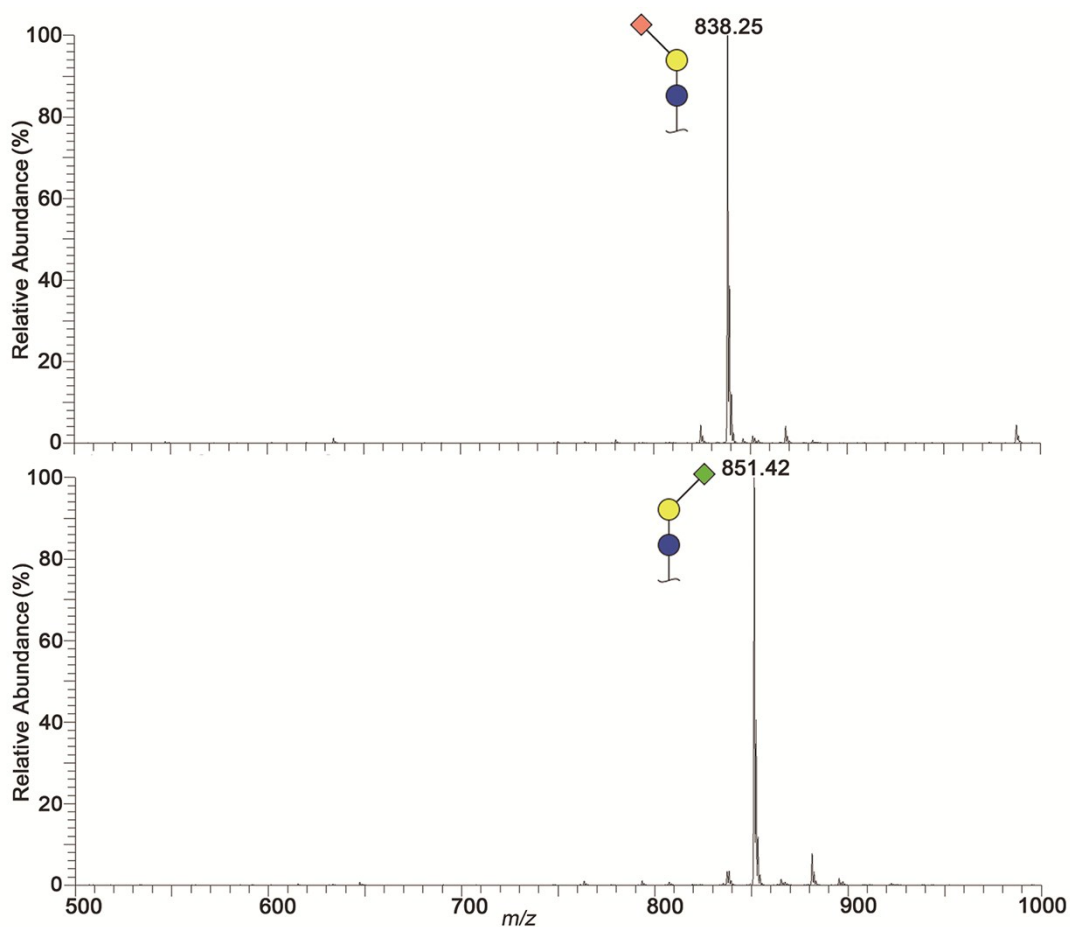

**Fig.S 5** ESI-MS spectra of  $\alpha$  2,3/ $\alpha$  2,6-Neu5Ac-Lac when  $\alpha$  2,6-Neu5Ac-Lac after dimethylamidated. Reaction condition, 1 h, 60°C, in the presence of EDC + HOBT+dimethylamine in DMSO. The  $\alpha$  2,3-Neu5Ac-Lac were lactonized. Permethylation was conducted for the dimethylamidated  $\alpha$  2,6-Neu5Ac-Lac and the lactonized  $\alpha$  2,3-Neu5Ac-Lac. With the two-step derivatization, a mass difference of 13 Da between  $\alpha$  2,3-sialic acid and  $\alpha$  2,6-sialic acid can be obtained.

**Table S1.** Comprehensive quali-quantitative profiling of Bn-*O*-glycome in L02 and SMMC-7721 cells by MS.

| Permethylation of Bn- <i>O</i> -glycans |                    |                                   |                                                 |                                                                                       |
|-----------------------------------------|--------------------|-----------------------------------|-------------------------------------------------|---------------------------------------------------------------------------------------|
| No.                                     | Glycan composition | <i>m/z</i> ([M+Na] <sup>+</sup> ) | Intensity ratios <sup>a</sup><br>(Mean±SD, n=3) | Proposed structure                                                                    |
| 1                                       | N1H1S1             | 955.25<br>(960.33)                | 1.26±0.11                                       | 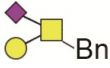   |
| 2                                       | N2H2               | 1043.33                           | -                                               |    |
| 3                                       | N2H1S1             | 1200.33<br>(1205.33)              | 0.29±0.01                                       |    |
| 4                                       | N1H1S2             | 1316.33<br>(1321.33)              | 0.70±0.01                                       |    |
| 5                                       | N1H1S1G1           | 1346.33                           | -                                               |   |
| 6                                       | N2H2S1             | 1404.42<br>(1409.42)              | 2.72±0.63                                       |  |
| 7                                       | N2H1S2             | (1566.42)                         | -                                               |  |
| 8                                       | N2H2F1S1           | 1578.17<br>(1583.25)              | 0.88±0.23                                       |  |
| 9                                       | N3H2S1             | (1654.42)                         | -                                               |  |
| 10                                      | N1H1S3             | (1682.33)                         | -                                               |  |
| 11                                      | N2H2S2             | 1765.42<br>(1770.50)              | 0.96±0.08                                       |  |
| 12                                      | N2H2F1S2           | 1939.33<br>(1944.50)              | 0.31±0.07                                       |  |

Structure formulas: yellow square, N-acetylgalactosamine (GalNAc, N); blue square, N-acetylglucosamine (GlcNAc, N); yellow circle, galactose (Gal, H); red triangle, fucose (Fuc, F); purple diamond, sialic acid (Neu5Ac, S); white gray diamond, sialic acid (Neu5Gc, G). <sup>a</sup> Intensity ratios of Bn<sup>d0</sup>-*O*-glycans to Bn<sup>d5</sup>-*O*-glycans (n=3). – means *O*-glycans were detected only in L02 or SMMC-7721 cells.

Table S2. Comprehensive quali-quantitative discrimination linkage specificity of Bn-*O*-glycans with/without sialic acids ends in L02 and SMMC-7721 cells.

| No. | Glycan composition | Two-step derivatization of Bn- <i>O</i> -glycans |                                                 | Proposed structure |
|-----|--------------------|--------------------------------------------------|-------------------------------------------------|--------------------|
|     |                    | <i>m/z</i> ([M+Na] <sup>+</sup> )                | Intensity ratios <sup>a</sup><br>(Mean±SD, n=3) |                    |
| 1   | N1H1S1             | 955.25<br>(960.33)                               | 0.81±0.06                                       |                    |
|     |                    | 968.33<br>(973.42)                               | 1.19±0.09                                       |                    |
| 2   | N2H2               | 1043.42                                          | -                                               |                    |
| 3   | N2H1S1             | 1200.50<br>(1205.42)                             | 0.38±0.10                                       |                    |
|     |                    | 1316.42<br>(1321.42)                             | 1.35±0.14                                       |                    |
| 4   | N1H1S2             | 1329.42<br>(1334.42)                             | 0.84±0.01                                       |                    |
|     |                    | 1359.33                                          | -                                               |                    |
| 6   | N2H2S1             | 1404.42<br>(1409.42)                             | 2.32±0.30                                       |                    |
|     |                    | 1566.50                                          | -                                               |                    |
| 7   | N2H1S2             | 1579.50                                          | -                                               |                    |
|     |                    | 1579.50                                          | -                                               |                    |
| 8   | N2H2F1S1           | -                                                | -                                               | -                  |
| 9   | N3H2S1             | (1654.42)                                        | -                                               |                    |
| 10  | N1H1S3             | (1695.50)                                        | -                                               |                    |
| 11  | N2H2S2             | 1765.58<br>(1770.58)                             | 1.07±0.14                                       |                    |
|     |                    | 1939.67<br>(1944.67)                             | 0.81±0.17                                       |                    |
| 12  | N2H2F1S2           | (1944.67)                                        | 0.81±0.17                                       |                    |

Structure formulas: yellow square, N-acetylgalactosamine (GalNAc); blue square, N-acetylglucosamine (GlcNAc);

yellow circle, galactose (Gal); red triangle, fucose (Fuc); gray diamond,  $\alpha$ 2,3-Neu5Gc; pink diamond,  $\alpha$ 2,3-Neu5Ac; green diamond,  $\alpha$ 2,6-Neu5Ac; purple diamond,  $\alpha$ 2,8-Neu5Ac. <sup>a</sup> Intensity ratios of Bn<sup>d0</sup>-*O*-glycans to Bn<sup>d5</sup>-*O*-glycans (n=3). – means *O*-glycans were detected only in L02 or SMMC-7721 cells.
